# Supplementary material
Source: MDPI journal article supplement (https://www.mdpi.com/2071-1050/8/4/337)
Supplement: s1 [file s1]

## Sheet: Sheet1
Year		1995	1996	1997	1998	1999	2000	2001	2002	2003	2004	2005	2006	2007	2008	2009
CO2 emissions (Kilotons)	Agriculture, Hunting, Forestry and Fishing	104619	107205	110197	113314	113086	92797.6	93488.2	98075.5	106308	124654	134333	139228	135369	116412	118136
	Mining and Quarrying	97150.9	100366	90669.1	100549	85498.7	83188	84956.7	84763.3	98153.6	130181	135625	138574	157915	198054	195472
	Food, Beverages and Tobacco	78513.3	71272.1	64397.8	71711.5	60212.8	49492.1	49577.3	47519.5	46816.5	52179.5	55460.6	55350.5	58181.1	72451.1	70816.3
	Textiles and Textile Products	57379.3	45993.1	41905.8	44672	36138.9	32559.8	32979.1	32279.7	35456.6	43955	44118.8	44363.4	46305.2	52637.2	49718.1
	Leather, Leather and Footwear	4261.04	3603.46	3459.97	3654.96	3107.64	2724.22	2663.85	2548.43	2914.01	3433.63	3201.25	3255.62	3372.88	3753.7	3547.54
	Wood and Products of Wood and Cork	9065.84	7482.21	7076.49	8221.26	6594.52	5638.23	5942.62	5712.89	6951.68	8968.03	9297.33	9513.85	9776.76	12107.1	12007.2
	Pulp, Paper, Paper , Printing and Publishing	40402.3	35345.5	31747.9	34758.4	27123.4	27446.9	27451.9	27876.1	28045.4	37781.1	37758	37953	38285.4	52287.6	52004
	Coke, Refined Petroleum and Nuclear Fuel	49989.4	50346.3	57465.4	57360.9	53510	58111.8	59327.4	61952.4	68895.3	81129.1	81972.7	85478.5	89174.4	91850	100868
	Chemicals and Chemical Products	230291	237460	207818	220402	183388	179043	160471	164490	186311	178162	198595	221558	242562	284167	269228
	Rubber and Plastics	28255.2	27368.9	22315.3	24400.7	19826.8	15630.4	15261.7	13661.4	15332.8	20708	19661.3	19449.6	19633.8	24930.2	23431.9
	Other Non-Metallic Mineral	381064	378116	367943	393023	350815	332386	313950	319065	371800	507508	534003	554752	585342	718748	712485
	Basic Metals and Fabricated Metal	305037	300328	303518	304993	279870	271869	277856	299653	360762	426482	507527	510880	562856	577616	628254
	Machinery, Nec	41954.8	42380.9	36187.5	35309.2	28690.4	23288.2	23575.5	24024.5	24663.1	27231.8	28306.6	29695.3	31041.3	37482	39112.3
	Electrical and Optical Equipment	15866.5	16275.3	14876.8	15084.7	12640.1	11184.3	10796.4	11080.8	10809.2	12213.1	13111.3	14973	15371.3	18361.8	19034.4
	Transport Equipment	17185.7	17625.1	16172.9	17079.6	16019.7	13555.7	14078.5	13550	13203.8	17713	18752.9	19381.5	19970.7	24816.3	25382.5
	Manufacturing, Nec; Recycling	12269.4	10406.6	7426	7999.31	7052.13	5969.09	5955.05	5609.52	5135.64	5292.06	4614.08	4986.3	4720.71	5943.12	5626.01
	Electricity, Gas and Water Supply	1.05168e+06	1.14382e+06	1.18384e+06	1.24868e+06	1.2889e+06	1.34496e+06	1.39934e+06	1.56875e+06	1.86312e+06	2.19828e+06	2.46583e+06	2.79676e+06	3.04703e+06	3.13545e+06	3.32628e+06
	Construction	16491.7	16925.8	16783.7	21924.3	21284.2	22863	23625.6	25231.4	26657.7	53961.5	57564.1	62108.4	67625.8	59506.2	71418.2
	Sale, Maintenance and Repair of Motor Vehicles and Motorcycles; Retail Sale of Fuel	62.2131	59.3809	59.1329	65.5184	64.6753	57.1975	58.2606	62.8039	68.5518	87.1403	133.095	135.41	142.288	157.665	166.389
	Wholesale Trade and Commission Trade, Except of Motor Vehicles and Motorcycles	16389.5	17529.7	15347.1	14125	17399.2	14373.5	14792.4	14888.7	10692	9549.4	5888.79	5316.39	5741.96	7713.59	8158.97
	Retail Trade, Except of Motor Vehicles and Motorcycles; Repair of Household Goods	5189.5	5720.62	5424.51	5191.17	5833.53	5386.66	5474.3	5707.54	5350.07	5678.61	7251.7	7228.75	6008.88	6962.83	7342.39
	Hotels and Restaurants	7112.16	6613.65	4627.24	4927.15	5419.23	5473.25	5731.36	6192.98	6108.15	10147.1	10917.1	12825.4	13707.3	18300.5	21702
	Inland Transport	43161.4	39958.1	48039.1	59414.8	61430.3	64903.6	64615.6	66863.3	73698.3	78050.2	85011.4	88613.5	92896.3	98913.3	98229.1
	Water Transport	17268.2	17904.2	22441.2	29095.8	38656.6	53300.2	61988.8	70923.5	75736.8	75880.4	81746.2	88993.4	94843.6	94966.4	99999.5
	Air Transport	15170.1	13397.7	16469.1	25485.7	23291.4	20459.5	27451.4	31097.8	40002.4	46861	37399.8	39022.8	48098.9	45551.1	78173.7
	Other Supporting and Auxiliary Transport Activities; Activities of Travel Agencies	3408.02	4167.78	4097.2	4235.15	4991.93	6438.29	6248.64	5915.65	11861.4	18230.7	22491.7	24779.5	29619.8	30231.2	30648.7
	Post and Telecommunications	1135.9	1344.08	1527.51	1798.96	2214.55	3408.76	3584.16	3731.32	3984.5	4660.5	4710.24	4906.74	5073.91	5660.53	5815.38
	Financial Intermediation	3699.2	3269.29	2229.2	2133	2537.08	2172.47	2168.4	2133.28	2124.23	2386.23	2227.87	2481.36	2856.12	2965.74	3233.38
	Real Estate Activities	9192.68	8069.84	4403.55	4499.77	4551.3	4294.33	4452.02	4715.66	5163.16	5299.2	4701.08	4134.67	3486.23	3488.9	4067.53
	Renting of M&Eq and Other Business Activities	8247.66	9210.82	7222.73	8336.16	10233.4	9406.6	10268.5	10902.3	11238.5	14554.9	15158.3	16329.2	17738.3	24098.6	25961.3
	Public Admin and Defence; Compulsory Social Security	10541.8	11264.2	9386.87	8781.64	9917.92	8767.77	8994.02	9042.26	10448.7	13770.3	14754.2	16377.1	16821.8	23931.5	25980.9
	Education	17795.3	19655	13395.2	14012.2	13590.8	12407.7	12133.2	11801.2	12114.1	11902	12001.5	12148.1	11792.3	17759	19245.7
	Health and Social Work	5444.83	5921.28	4422.15	4525.63	4215.75	3629.76	3458.5	3175.65	4163.34	5604.79	7269.29	9379.83	11132.5	20148.4	22572.2
	Other Community, Social and Personal Services	17829.1	20160.3	19389.6	18256	18943.5	17737.9	17959.5	18623.5	20068	22986.2	24703.6	26926.7	27613.5	36000.9	39434.1
	Private Households with Employed Persons	0	0	0	0	0	0	0	0	0	0	0	0	0	0	0
	total emission	2.72313e+06	2.79656e+06	2.76229e+06	2.92803e+06	2.81705e+06	2.80493e+06	2.85068e+06	3.07162e+06	3.56416e+06	4.25548e+06	4.6861e+06	5.10786e+06	5.52211e+06	5.92342e+06	6.21355e+06
energy consumption(Terajoules)	Agriculture, Hunting, Forestry and Fishing	1.52589e+06	1.57137e+06	1.62182e+06	1.65225e+06	1.67731e+06	1.40996e+06	1.45643e+06	1.5212e+06	1.62561e+06	1.85486e+06	2.00203e+06	2.09504e+06	2.05057e+06	1.81453e+06	1.85356e+06
	Mining and Quarrying	1.52918e+06	1.55097e+06	1.55735e+06	1.6742e+06	1.55182e+06	1.59234e+06	1.66703e+06	1.70177e+06	1.94586e+06	2.33773e+06	2.44809e+06	2.5152e+06	2.78099e+06	3.36e+06	3.28026e+06
	Food, Beverages and Tobacco	1.0255e+06	945747	867068	969644	825117	718042	728857	728169	701961	795664	880981	930038	995439	1.17108e+06	1.17362e+06
	Textiles and Textile Products	850061	698482	656451	692538	592046	578993	606848	639652	714016	901383	983763	1.09545e+06	1.19572e+06	1.27466e+06	1.233e+06
	Leather, Leather and Footwear	63628.3	56451.9	56906.8	59004.6	52027.5	48927.1	49565.4	50605.1	59113.8	70023.4	70545.6	76606.6	81897.4	86177.6	84472.4
	Wood and Products of Wood and Cork	137050	119995	123558	125036	116132	108855	116541	115372	133591	161137	180128	197731	211327	250145	255812
	Pulp, Paper, Paper , Printing and Publishing	573523	519391	486244	525734	449299	471251	482244	515467	546551	688870	721154	754454	764115	926803	942591
	Coke, Refined Petroleum and Nuclear Fuel	8.85553e+06	9.07745e+06	9.88862e+06	9.51387e+06	1.01247e+07	1.10863e+07	1.14483e+07	1.24951e+07	1.39681e+07	1.62269e+07	1.74235e+07	1.78492e+07	1.9309e+07	1.89752e+07	2.12476e+07
	Chemicals and Chemical Products	3.80102e+06	4.19833e+06	3.99612e+06	4.15299e+06	3.74764e+06	3.88384e+06	3.82106e+06	4.11243e+06	4.73089e+06	4.82191e+06	5.18346e+06	5.75531e+06	6.279e+06	6.78942e+06	6.81683e+06
	Rubber and Plastics	402393	426528	375659	392343	364778	325438	331966	320765	348579	419243	461366	477720	502679	577425	579991
	Other Non-Metallic Mineral	3.3967e+06	3.42413e+06	3.2894e+06	3.51027e+06	3.05914e+06	2.87012e+06	2.72621e+06	2.74046e+06	3.21346e+06	4.48345e+06	4.69239e+06	4.83294e+06	4.99395e+06	6.43333e+06	6.65621e+06
	Basic Metals and Fabricated Metal	6.38867e+06	6.56057e+06	6.74457e+06	6.38312e+06	6.05008e+06	6.02496e+06	6.03953e+06	6.59738e+06	8.22506e+06	9.37829e+06	1.15901e+07	1.39717e+07	1.54712e+07	1.65302e+07	1.73401e+07
	Machinery, Nec	529222	536137	474611	464840	399818	356708	374163	409119	444896	508959	552593	589629	641993	755150	782030
	Electrical and Optical Equipment	228927	240557	234130	242150	226869	228135	232355	259642	283260	342173	399301	458831	492471	574357	587806
	Transport Equipment	277853	290054	285106	289399	258988	255824	276242	284832	291424	364133	362025	388464	422636	501234	542045
	Manufacturing, Nec; Recycling	148976	131349	97180.5	103563	97970.1	89497.3	92911.8	93623.1	86913.1	83702.2	80740.9	92492.3	90389.4	106300	104920
	Electricity, Gas and Water Supply	1.31103e+07	1.40666e+07	1.466e+07	1.53865e+07	1.59014e+07	1.66162e+07	1.7483e+07	1.95529e+07	2.31861e+07	2.76044e+07	3.08835e+07	3.47513e+07	3.79737e+07	3.94415e+07	4.18723e+07
	Construction	460107	524580	550439	611361	565977	597344	608658	680243	716127	1.16036e+06	1.22362e+06	1.32751e+06	1.4345e+06	1.36882e+06	1.63826e+06
	Sale, Maintenance and Repair of Motor Vehicles and Motorcycles; Retail Sale of Fuel
	Wholesale Trade and Commission Trade, Except of Motor Vehicles and Motorcycles	251856	280315	259470	257907	319184	292450	310973	327509	270192	251366	165180	169052	215969	275130	307189
	Retail Trade, Except of Motor Vehicles and Motorcycles; Repair of Household Goods	76416.7	86649.7	84460.6	84185.1	96512.1	93025.2	96816.2	103042	98412.9	101702	153354	161021	107656	127211	137461
	Hotels and Restaurants	107534	106460	89904.9	102517	119079	129584	139702	155615	167369	250370	273488	327618	350123	436048	516439
	Inland Transport	543134	514030	612635	765603	802201	862579	869661	906832	1.01155e+06	1.07713e+06	1.17326e+06	1.23785e+06	1.31586e+06	1.40651e+06	1.40836e+06
	Water Transport	229557	237619	296994	383597	508294	702024	814970	931661	995514	994273	1.07189e+06	1.1667e+06	1.24419e+06	1.24711e+06	1.31309e+06
	Air Transport	212114	187326	230287	356383	325699	286085	383877	434865	559406	655304	522913	545622	672585	636940	1.09319e+06
	Other Supporting and Auxiliary Transport Activities; Activities of Travel Agencies	52606.2	69438.5	75370.6	70438.8	78682	97142.9	91861.8	84792.9	162766	247518	304562	335332	399584	407537	413900
	Post and Telecommunications	29075.4	38401.8	47271.6	53526.2	63474.6	84518	93438	104893	113393	129669	134733	144467	144908	169095	184776
	Financial Intermediation	68133.5	62391.5	46391.1	50636.5	61418.4	60766.4	62826.2	65154.1	63629.7	64928.4	61638.6	73173.1	87266	97162.8	113792
	Real Estate Activities	111674	100215	60661.5	64403.7	67764.3	66892.5	71153.1	77714.1	83734.4	86953.5	79407.4	74703.2	66795.4	67672.9	82122.3
	Renting of M&Eq and Other Business Activities	111173	126911	109923	132922	167265	163507	182075	198256	202006	253622	266996	294332	319770	412258	454095
	Public Admin and Defence; Compulsory Social Security	158843	175757	160579	153992	174373	164176	171650	177430	198562	250278	266216	299051	303073	396569	438892
	Education	239102	276909	228524	241700	245186	236982	239582	243188	247503	249071	258601	282646	289451	376300	421255
	Health and Social Work	71121.7	81902	72827.3	75269.6	73396.9	66044.8	64652.2	59687.1	74298.1	96418.6	121629	160065	186679	294789	335900
	Other Community, Social and Personal Services	214312	249514	250340	231316	244060	228580	233232	241805	257728	298661	317293	349080	367888	471718	513899
	Private Households with Employed Persons	0	0	0	0	0	0	0	0	0	0	0	0	0	0	0
total energy consumption(Terajoules)		4.57812e+07	4.75326e+07	4.85909e+07	4.97732e+07	4.94076e+07	5.07971e+07	5.23684e+07	5.69312e+07	6.57275e+07	7.72105e+07	8.53105e+07	9.37804e+07	1.01763e+08	1.07758e+08	1.14726e+08
Output(millions of US$)	Agriculture, Hunting, Forestry and Fishing	236257	278059	291493	301093	301766	306944	325931	343348	360423	443439	468423	515515	642708	828462	880438
	Mining and Quarrying	58773.1	65660.6	72976.9	70432.9	74261.1	91538.1	89710.9	90842.3	112204	174993	218708	271015	342147	441474	466033
	Food, Beverages and Tobacco	121272	153115	170709	169456	169220	174528	184664	194355	231681	261835	328891	429917	571952	737992	779046
	Textiles and Textile Products	109184	120910	120899	128012	135232	150917	167194	179367	208661	228739	285736	375594	477989	616750	651060
	Leather, Leather and Footwear	25957.5	32673.5	34357.7	35323.7	35133.5	37477.3	41815	44549.2	51015.5	50725	61150	79802.6	99916.4	128922	136094
	Wood and Products of Wood and Cork	20098.7	25094.8	28754.2	29627.9	31534.8	35377.9	40593.1	43015.3	49215	55552.7	69334.9	96764.1	130242	168052	177400
	Pulp, Paper, Paper , Printing and Publishing	35686.4	44562.3	48464.3	50762.1	51894.6	54670	59564.7	62451.2	73272.6	94006.5	120566	134736	173716	224146	236615
	Coke, Refined Petroleum and Nuclear Fuel	32449.1	34682.9	39210.6	37854.6	43380.5	58337.6	67801.8	78852.4	83172.9	120165	142774	141916	188720	243506	257052
	Chemicals and Chemical Products	85128.6	105480	114024	114332	125048	141799	152309	168147	216888	263286	333639	425480	591762	763552	806029
	Rubber and Plastics	42507.7	55268.9	63542.5	67398	68313.6	73854.2	80914.7	85991	101144	114056	145288	193987	256364	330787	349189
	Other Non-Metallic Mineral	83780.1	101947	113769	111960	111386	115080	118599	118524	133352	153512	190412	227251	295275	380994	402189
	Basic Metals and Fabricated Metal	153671	177825	197417	197529	197961	211880	227216	235791	314085	411050	512307	709879	969647	1.25114e+06	1.32074e+06
	Machinery, Nec	76493.6	85187.5	92447.5	98091.6	105856	120021	137361	155572	191270	228418	284261	373193	499369	644338	680182
	Electrical and Optical Equipment	94552.2	111164	134243	156886	177342	220258	246453	287169	358375	451548	576518	833500	1.06156e+06	1.36973e+06	1.44593e+06
	Transport Equipment	49977	58741.2	65433.1	71574.4	76733.8	83680	99389	123778	167258	184059	233611	282034	413192	533144	562802
	Manufacturing, Nec; Recycling	12814.7	14823.9	15343.8	15794.1	17736	20530.8	23994.1	27127	28832	25056.2	30203.7	49165.7	62148.3	80190.2	84651.2
	Electricity, Gas and Water Supply	35152.6	38892.6	50162.9	56971.3	64991	68441	77363.3	87715.7	114456	185932	247384	251230	353744	456437	481828
	Construction	153567	182535	193948	218991	237034	263567	294463	333264	387116	450474	544028	670900	869224	1.16617e+06	1.41698e+06
	Sale, Maintenance and Repair of Motor Vehicles and Motorcycles; Retail Sale of Fuel	0	0	0	0	0	0	0	0	0	0	0	0	0	0	0
	Wholesale Trade and Commission Trade, Except of Motor Vehicles and Motorcycles	97815.4	112276	124004	134092	143608	154534	170701	184823	202428	221127	178566	212618	379477	519567	584813
	Retail Trade, Except of Motor Vehicles and Motorcycles; Repair of Household Goods	20235.6	23227.2	25653.3	27740.3	29708.9	31969.4	35313.9	38235.2	41877.4	45745.7	117505	139913	78504.5	107486	120983
	Hotels and Restaurants	34690	38420.7	44543.7	51499.7	56441.7	62941.3	71011.1	81304.9	94727.7	112751	132362	157683	194157	253505	277315
	Inland Transport	45155.2	52131.9	56531.3	62890.5	69012.5	81126.1	89293.7	96028.3	101920	120375	136846	163412	207495	254597	269863
	Water Transport	4738.77	6051.83	7211.17	13827.6	21273.9	31861.5	42262.1	52805	52794.6	58669.7	65583.4	75325.9	83547.9	102513	108660
	Air Transport	6190.85	7299.83	8086.12	9180.57	10287.4	12356.7	13906.2	15301.2	16747.6	20105.8	20332.3	25839.5	33565.9	41185.4	43655
	Other Supporting and Auxiliary Transport Activities; Activities of Travel Agencies	13809	17117.5	19874.1	20185.3	19838.2	20353.7	18847.4	16113.5	22042.1	31874	48680	57355.2	85350.7	104726	111005
	Post and Telecommunications	10083.7	13591.5	18429.9	23684	29582.4	37801.2	48394.5	59878.7	70826.5	86059.9	101157	118683	143730	187438	210486
	Financial Intermediation	58641.1	65442.5	71280.1	72509.8	74160.4	78671.2	83045.8	87164.8	92911.7	98946.9	111127	149651	235297	310370	376387
	Real Estate Activities	37278	41556.2	46421.6	55067.7	59483.6	67529.1	77330.7	88330.9	99475.1	112699	131652	160377	217777	254486	327500
	Renting of M&Eq and Other Business Activities	34370.7	43523.2	56416.5	65532.9	73997	85193.8	99304.1	111841	130968	156830	192040	234400	309687	403861	453523
	Public Admin and Defence; Compulsory Social Security	35236.1	43090.5	54036.2	63007.6	71438	82611.8	96754.3	109531	123147	141628	166953	196223	233585	304617	342074
	Education	24879.4	31281.7	40213.8	46152.1	51481.2	58544.4	67395.6	74954.6	85693.9	100155	122089	148374	193175	251919	282896
	Health and Social Work	18015.9	22947.4	29914.5	33519.1	36358.7	40017.2	44333.1	47123.2	58980.8	75011.6	96680.3	123640	164443	214449	240819
	Other Community, Social and Personal Services	20355.8	24784.9	30943.7	36936.9	42891.5	50823.3	61021.8	70855.3	80659.7	93937.9	112683	134802	181448	236626	265723
	Private Households with Employed Persons	0	0	0	0	0	0	0	0	0	0	0	0	0	0	0
	population（10^4 person）	121121	122389	123626	124761	125786	126743	127627	128453	129227	129988	130756	131448	132129	132802	133450
DATA SOURCE：World Input-Output Datebase
